# Supplementary material for: The World's Most Isolated and Distinct Whale Population? Humpback Whales of the Arabian Sea
Source: PLoS One. 2014 Dec 3;9(12):e114162. doi: 10.1371/journal.pone.0114162 (PMC4254934; doi:10.1371/journal.pone.0114162)
Supplement: Table S1 — Statistical values obtained in the Bayesian population structure analysis implemented in STRUCTURE using different priors: a) No admixture and prior information on origin of population; b) No admixture and no prior information on origin of population. (XLSX) [file pone.0114162.s002.xlsx]

## Sheet: Sheet1
No Admixture, Locprior
K	Reps	Mean LnP(K)	Stdev LnP(K)
1	10	-62045.11	0.0316
2	10	-62314.49	10.1246
3	10	-62175	17.5556
4	10	-66393.61	931.7662
5	10	-66244.68	847.3654
6	10	-67470.9	1823.4989
7	10	-68246.99	602.7833
8	10	-68587.54	1268.726
9	10	-69407.81	1208.1093
10	10	-70019.28	1712.7285
No Admixture. No Locprior
K	Reps	Mean LnP(K)	Stdev LnP(K)
1	10	-62045.13	0.0483
2	10	-62186.9	8.4606
3	10	-63054.17	147.2699
4	10	-64153.09	1104.3673
5	10	-64950.42	156.579
6	10	-65686.65	1110.135
7	10	-66942.17	818.6619
8	10	-68425.82	1154.2706
9	10	-71433.65	1660.9942
10	10	-74128.54	3750.8488
