# Supplementary material for: The World's Most Isolated and Distinct Whale Population? Humpback Whales of the Arabian Sea
Source: PLoS One. 2014 Dec 3;9(12):e114162. doi: 10.1371/journal.pone.0114162 (PMC4254934; doi:10.1371/journal.pone.0114162)
Supplement: Table S2 — Estimated contemporary effective population size and number of breeders obtained with the linkage disequilibrium and heterozygote excess methods in the program NeEstimator V2 for Southern Hemisphere humpback whale populations. (XLSX) [file pone.0114162.s003.xlsx]

## Sheet: Sheet1
Supplementary Table S2
Population	Oman			Brazil			Gabon			West South Africa
Lowest Allele Frequency Used	0.05	0.02	0.01	0.05	0.02	0.01	0.05	0.02	0.01	0.05	0.02	0.01
Linkage Disequilibrium Method
Estimated Ne	90.4	107.4	142.6	526.7	412.5	194.4	1066.4	776.6	863.3	276.4	288.7	324.7
95% confidence intervals	47.7-382.4	56.8-478.1	67.7-4380	151.7-infinite	165.1-infinite	122.1-431.2	714.6-1930.4	776.6-1660.6	841.7-1763.5	171.2-618.6	196.1-511.7	222.1-570.1
Heterozygote Excess Method
Estimated Neb	29.9	25.2	26.1	47.7	44.6	69.1	infinite	infinite	infinite	40.8	46.3	47.8
95% confidence intervals	10.1-infinite	10.5-infinte	10.9-infinite	11.8-infinite	12.7-infinite	16.0-infinite	-	-	-	14.1-infinite	16.8-infinite	18.4-infinite
Population	Madagascar			South Madagascar			Myotte			Mozambique
Lowest Allele Frequency Used	0.05	0.02	0.01	0.05	0.02	0.01	0.05	0.02	0.01	0.05	0.02	0.01
Linkage Disequilibrium Method
Estimated Ne	1201.7	1032.4	968.9	infinite	1254.6	473.5	283.8	262.5	158.9	404.1	582.8	619.0
95% confidence intervals	800.6-2201.9	771.8-1502.7	761.9-1300.2		168.4-infinite	151.7-infinite	151.3-1303.2	165.5-570.2	121.0-224.5	167.8.infinite	239.0-infinite	257.8-infinite
Heterozygote Excess Method
Estimated Neb	infinite	infinite	1918.5	20.5	29.9	39.6	infinite	infinite	infinite	104.3	73.4	77.6
95% confidence intervals	-	-	53.5-infinite	7.6-infinite	10.9-infinite	13.3-infinite	-	-	-	13.1-infinite	15-infinite	16.1-infinite
Population	East South Africa
Lowest Allele Frequency Used	0.05	0.02	0.01
Linkage Disequilibrium Method
Estimated Ne	5590.1	1610.1	904.4
95% confidence intervals	390.4-infinite	400.6-infinite	324.5-infinite
Heterozygote Excess Method
Estimated Neb	74.0	313.1	191.7
95% confidence intervals	16.6-infinite	22.9-infinite	26.7-infinite
